# Supplementary material
Source: PubMed Central journal article supplement (PMC6371404)
Supplement: NIHMS1002861-supplement-2.pdf [file NIHMS1002861-supplement-2.pdf]

Supplementary Table 1: Country/area and Antimalarial Drug Therapy used (WHO, 2016)

| Designated WHO region                                                         | Antimalarial Drug Therapy                                                                                                                                                                                                                                                                       |                                                                                                     |
|-------------------------------------------------------------------------------|-------------------------------------------------------------------------------------------------------------------------------------------------------------------------------------------------------------------------------------------------------------------------------------------------|-----------------------------------------------------------------------------------------------------|
|                                                                               | <i>P. falciparum</i>                                                                                                                                                                                                                                                                            | <i>P. vivax</i>                                                                                     |
| Central Africa                                                                | AL <sup>a</sup> ; AS+AQ <sup>b</sup>                                                                                                                                                                                                                                                            | -                                                                                                   |
| South-East Africa                                                             | AL <sup>a</sup> ; AS+AQ <sup>b</sup>                                                                                                                                                                                                                                                            | CQ <sup>α</sup> ; AL <sup>β</sup> ; CQ-PQ <sup>γ</sup> ; AL-PQ <sup>δ</sup> ; AS+AQ+PQ <sup>ε</sup> |
| West Africa                                                                   | AL <sup>a</sup> ; AS+AQ <sup>b</sup> ; DHA-PPQ <sup>c</sup>                                                                                                                                                                                                                                     | **                                                                                                  |
| Americas                                                                      | AL <sup>a</sup> ; AL+PQ <sup>d</sup> ; AS+MQ+PQ <sup>e</sup> ; AS+MQ <sup>f</sup>                                                                                                                                                                                                               | CQ-PQ <sup>γ</sup>                                                                                  |
| Eastern Mediterranean                                                         | AL <sup>a</sup> ; AL+PQ <sup>d</sup> ; AS+SP+PQ <sup>g</sup> ; AS+SP <sup>h</sup>                                                                                                                                                                                                               | CQ-PQ <sup>γ</sup>                                                                                  |
| South-East Asia                                                               | AL <sup>a</sup> ; AL+PQ <sup>d</sup> ; AS+MQ <sup>f</sup> ; AS+SP+PQ <sup>g</sup> ; DHA-PPQ+PQ <sup>i</sup> ; DHA-PPQ <sup>j</sup>                                                                                                                                                              | CQ+PQ <sup>γ</sup> ; DHA-PPQ+PQ <sup>ζ</sup>                                                        |
| Western Pacific                                                               | AL <sup>a</sup> ; AS+AQ <sup>b</sup> ; AL+PQ <sup>d</sup> ; AS+MQ <sup>f</sup> ; DHA-PPQ+PQ <sup>i</sup> ; DHA-PPQ <sup>j</sup> ; ART+NQ <sup>k</sup> ; ART-PPQ <sup>l</sup>                                                                                                                    | CQ+PQ <sup>γ</sup> ; AL+PQ <sup>δ</sup> ; DHA-PPQ <sup>φ</sup>                                      |
| Antimalarial Drug Therapy Country/area with <i>P. vivax</i> resistant strains |                                                                                                                                                                                                                                                                                                 |                                                                                                     |
| CQ                                                                            | Bolivia, Cambodia, China, Democratic People's Republic of Korea, Philippines, Ethiopia, India, Malaysia, Myanmar, Timor – Leste, Vietnam, Madagascar, Afghanistan, Brazil, Columbia, Guyana, Indonesia, Pakistan, Papua New Guinea, Peru, Solomon Islands, Sri Lanka, Thailand, Turkey, Vanuatu |                                                                                                     |
| CQ+PQ                                                                         | Brazil, Democratic People's Republic of Korea, Philippines                                                                                                                                                                                                                                      |                                                                                                     |
| DHA-PPQ                                                                       | Pakistan, Cambodia, Viet Nam                                                                                                                                                                                                                                                                    |                                                                                                     |
| AL                                                                            | Papua New Guinea, Philippines, Solomon Islands, Vanuatu                                                                                                                                                                                                                                         |                                                                                                     |

A, Artemether; L, Lumefantrine; AS, Artesunate; AQ, Amodiaquine; DHA, Dihydroartemisinin; PPQ, Piperaquine; PQ, Primaquine; MQ, Mefloquine; SP, Sulfadoxine-Pyrimethamine; NQ, Naphthoquinone, ART, Artemisinin

**Central Africa:** Angola<sup>a</sup>, Burundi<sup>b</sup>, Cameroon<sup>b</sup>, Central African Republic<sup>a</sup>, Chad<sup>a,b</sup>, Congo<sup>b</sup>, Democratic Republic of the Congo<sup>b</sup>, Equatorial Guinea<sup>b</sup>, Gabon<sup>b</sup>, Sao Tome and Principe<sup>b</sup>; **South-East Africa:** Botswana<sup>a</sup>, Comoros<sup>a</sup>, Eritrea<sup>b,e</sup>, Ethiopia<sup>a</sup>, Kenya<sup>a</sup>, Madagascar<sup>b</sup>, Malawi<sup>a</sup>, Mozambique<sup>a</sup>, Namibia<sup>a,b</sup>, Rwanda<sup>a</sup>, South Africa<sup>a,y,d</sup>, South Sudan<sup>b,e</sup>, Swaziland<sup>a</sup>, Uganda<sup>a</sup>, United Republic of Tanzania<sup>a,b</sup>, Zambia<sup>a</sup>, Zimbabwe<sup>a</sup>; **West Africa:** Algeria<sup>a</sup>; Benin<sup>a</sup>, Burkina Faso<sup>a,b</sup>, Cabo Verde<sup>a</sup>, Côte d'Ivoire<sup>a</sup>, Gambia<sup>a</sup>, Ghana<sup>a,b</sup>, Guinea<sup>b</sup>, Guinea-Bissau<sup>a</sup>, Liberia<sup>b</sup>, Mali<sup>a,b</sup>, Mauritania<sup>a,b</sup>, Niger<sup>a</sup>, Nigeria<sup>a,b</sup>, Senegal<sup>a,b,c</sup>, Sierra Leone<sup>a,b</sup>, Togo<sup>a,b</sup>, Mayotte<sup>a,y</sup>; **Americas:** Argentina<sup>d,y</sup>, Belize<sup>y</sup>, Bolivia (Plurinational State of)<sup>d,y</sup>, Brazil<sup>d,e,y</sup>, Colombia<sup>a,y</sup>, Costa Rica<sup>y</sup>, Dominican Republic<sup>y</sup>, Ecuador<sup>d,y</sup>, El Salvador<sup>y</sup>, French Guiana<sup>a,y</sup>, Guyana<sup>d,y</sup>, Haiti<sup>y</sup>, Honduras<sup>y</sup>, Mexico<sup>y</sup>, Nicaragua<sup>y</sup>, Panama<sup>d,y</sup>, Paraguay<sup>d,y</sup>, Peru<sup>f,y</sup>, Suriname<sup>d,y</sup>, Venezuela (Bolivarian Republic of)<sup>e,y</sup>; **Eastern Mediterranean:** Afghanistan<sup>g,y</sup>, Djibouti<sup>d,y</sup>, Iran (Islamic Republic of)<sup>g,h,y</sup>, Pakistan<sup>g,y</sup>, Saudi Arabia<sup>g,y</sup>, Somalia<sup>d,d</sup>, Sudan<sup>a,h,d</sup>, Yemen<sup>h,y</sup>. **European:** Tajikistan<sup>y</sup>; **South-East Asia:** Bangladesh<sup>a,y</sup>, Bhutan<sup>a,y</sup>, India<sup>g,y</sup>, Indonesia<sup>i,z</sup>, Myanmar<sup>a,f,j,y</sup>, Nepal<sup>d,y</sup>, Sri Lanka<sup>d,y</sup>, Thailand<sup>j,y</sup>, Timor-Leste<sup>a,y</sup>; **Western Pacific:** Cambodia<sup>f,i,q</sup>, China<sup>b,j,k,l,y</sup>, Lao People's Democratic Republic<sup>a,y</sup>, Malaysia<sup>f,y</sup>, Papua New Guinea<sup>a,d</sup>, Philippines<sup>d,y</sup>, Solomon Islands<sup>a,d</sup>, Vanuatu<sup>a,d</sup>, Viet Nam<sup>j,y</sup>

\*\*As per World malaria report, WHO, 2016. However, *P. vivax* transmission and treatment is reported in the literature. e.g, *P. vivax* has been reported in Mali. (Howes RE, Reiner Jr., RC, Battle KE, Longbottom J, Mappin B, Ordanovich D, et al. (2015) Plasmodium vivax Transmission in Africa. PLoS Negl Trop Dis 9(11): e0004222. doi:10.1371/journal.pntd.0004222)
